# Supplementary material
Source: PubMed Central journal article supplement (PMC3646461)
Supplement: supp_M034918_jlr.M034918-1.pdf [file supp_M034918_jlr.M034918-1.pdf]

**FIGURE S1 (supplemental):** MS/MS spectra and MRM transition information of diols detected in piglet plasma

| MS/MS Spectrum <sup>a</sup> | Compound and transition                           | Structure <sup>b</sup> |
|-----------------------------|---------------------------------------------------|------------------------|
| Precursor Linoleic Acid     |                                                   |                        |
|                             | <p><b>12,13-DiHOME</b><br/>m/z 313.1 → 183.2</p>  |                        |
|                             | <p><b>9,10-DiHOME</b><br/>m/z 313.1 → 201.1</p>   |                        |
| Precursor Arachidonic Acid  |                                                   |                        |
|                             | <p><b>14,15-DiHETrE</b><br/>m/z 337.2 → 207.1</p> |                        |
|                             | <p><b>11,12-DiHETrE</b><br/>m/z 337.2 → 167.1</p> |                        |
|                             | <p><b>8,9-DiHETrE</b><br/>m/z 337.2 → 127.0</p>   |                        |

|                                                                                                                               |                                                  |                                                                                      |
|-------------------------------------------------------------------------------------------------------------------------------|--------------------------------------------------|--------------------------------------------------------------------------------------|
| 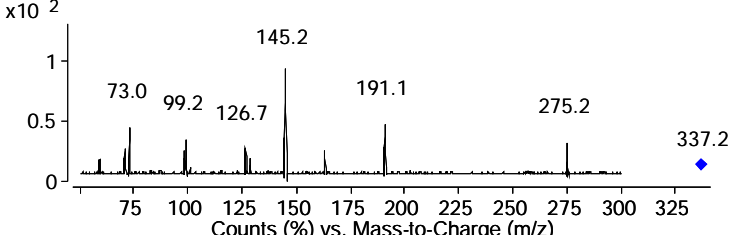 <p>Counts (%) vs. Mass-to-Charge (m/z)</p>  | <p><b>5,6-DiHETrE</b><br/>m/z 337.2 → 145.2</p>  |   |
| <p>Precursor Eicosapentaenoic Acid</p>                                                                                        |                                                  |                                                                                      |
|  <p>Counts (%) vs. Mass-to-Charge (m/z)</p>  | <p><b>17,18-DiHETE</b><br/>m/z 335.2 → 247.2</p> |   |
| <p>Precursor Docosahexaenoic Acid</p>                                                                                         |                                                  |                                                                                      |
|  <p>Counts (%) vs. Mass-to-Charge (m/z)</p> | <p><b>19,20-DiHDPa</b><br/>m/z 361.2 → 273.3</p> |  |

<sup>a</sup> MS/MS fragmentation was performed in neg. ion mode on a triple quadrupole mass spectrometer

(Agilent 6460), precursor ion = [M-H]<sup>-</sup> (negative ion mode)

<sup>b</sup> Structures were extracted from HMDB (71)
