# Supplementary material
Source: PubMed Central journal article supplement (PMC3646461)
Supplement: supp_M034918_jlr.M034918-2.pdf [file supp_M034918_jlr.M034918-2.pdf]

**TABLE S1 (supplemental):** Dose-response effect of dietary ARA intake at constant DHA, or DHA intake at constant ARA, on plasma fatty acid levels

|               | Coefficient |      |        |              | P-value   |      |        |              | FDR  | Coefficient |      |        |              | P-value   |     |        |              | FDR |
|---------------|-------------|------|--------|--------------|-----------|------|--------|--------------|------|-------------|------|--------|--------------|-----------|-----|--------|--------------|-----|
|               | Intercept   | ARA  | Gender | ARA x Gender | Intercept | ARA  | Gender | ARA x Gender |      | Intercept   | DHA  | Gender | DHA x Gender | Intercept | DHA | Gender | DHA x Gender |     |
| 18:2n-6 (LA)  | 0.33        | 0.28 |        |              | 0.00      | 0.03 |        |              | 0.06 | 0.47        |      |        | 0.00         |           |     |        | 1.00         |     |
| 18:3n-3 (ALA) | -0.95       | 0.31 |        |              | 0.00      | 0.05 |        |              | 0.06 | -0.80       |      |        | 0.00         |           |     |        | 1.00         |     |
| 20:4n-6 (ARA) | -0.03       | 0.39 |        |              | 0.43      | 0.00 |        |              | 0.00 | -0.84       |      |        | 0.00         |           |     |        | 1.00         |     |
| 20:5n-3 (EPA) | -1.60       |      |        |              | 0.00      |      |        |              | 1.00 | -1.75       | 0.18 |        | 0.00         | 0.06      |     |        | 0.18         |     |
| 22:6n-3 (DHA) | -0.03       | 0.15 | 0.06   |              | 0.47      | 0.03 | 0.09   |              | 0.06 | -0.32       | 0.54 |        | 0.00         | 0.00      |     |        | 0.00         |     |

Coefficient, p-value, and False Discovery Rate (FDR) for diet and gender (interaction) effects by linear mixed modeling methodology.
