# Supplementary material
Source: PubMed Central journal article supplement (PMC3646461)
Supplement: supp_M034918_jlr.M034918-3.pdf [file supp_M034918_jlr.M034918-3.pdf]

**TABLE S2 (supplemental):** Dose-response effect of dietary ARA intake at constant DHA on plasma metabolite concentrations

| Metabolite                  | Lipid Map ID <sup>a</sup> | Biosynthetic pathway | PUFA           | coefficients |       |        |               |              | p-values               |             |      |        |               | FDR |              |
|-----------------------------|---------------------------|----------------------|----------------|--------------|-------|--------|---------------|--------------|------------------------|-------------|------|--------|---------------|-----|--------------|
|                             |                           |                      |                | (Intercept)  | ARA   | Gender | ARA quadratic | ARA x Gender | ARA quadratic x Gender | (Intercept) | ARA  | Gender | ARA quadratic |     | ARA x Gender |
| 9(10)-EpOME                 | LMFA02000037              | CYP                  | 18:2n-6 (LA)   | 0.27         |       |        |               |              |                        | 0.00        |      |        |               |     | 1.00         |
| 9,10-DiHOME                 | LMFA01050350              | CYP                  | 18:2n-6 (LA)   | 0.82         |       |        | 0.20          |              |                        | 0.00        |      | 0.04   |               |     | 0.26         |
| 12(13)-EpOME                | LMFA02000038              | CYP                  | 18:2n-6 (LA)   | 0.39         |       |        |               |              |                        | 0.00        |      |        |               |     | 1.00         |
| 12,13-DiHOME                | LMFA01050351              | CYP                  | 18:2n-6 (LA)   | 0.87         |       | -0.06  | 0.24          |              |                        | 0.00        | 0.08 | 0.00   |               |     | 0.02         |
| 9-HODE                      | LMFA01050278              | LOX                  | 18:2n-6 (LA)   | 1.48         |       |        |               |              |                        | 0.00        |      |        |               |     | 1.00         |
| 13-HODE                     | LMFA01050349              | LOX                  | 18:2n-6 (LA)   | 1.70         | 0.14  |        |               |              |                        | 0.00        | 0.05 |        |               |     | 0.26         |
| 13-KODE                     | LMFA02000016              | LOX                  | 18:2n-6 (LA)   | 0.57         |       |        |               |              |                        | 0.00        |      |        |               |     | 1.00         |
| 9-HOTrE                     | LMFA02000024              | LOX                  | 18:3n-3 (ALA)  | 0.07         |       |        |               |              |                        | 0.13        |      |        |               |     | 1.00         |
| PGF1a                       | LMFA03010137              | COX                  | 20:3n-6 (DGLA) | 0.35         | -0.16 |        |               |              |                        | 0.00        | 0.07 |        |               |     | 0.26         |
| PGF2a                       | LMFA03010002              | COX                  | 20:4n-6 (ARA)  | 0.60         |       |        |               |              |                        | 0.00        |      |        |               |     | 1.00         |
| PGE2                        | LMFA03010003              | COX                  | 20:4n-6 (ARA)  | -0.17        |       | 0.21   |               |              |                        | 0.02        |      | 0.05   |               |     | 1.00         |
| 13,14-dihydro-15-keto-PGF2a | LMFA03010027              | COX                  | 20:4n-6 (ARA)  | 0.10         |       |        |               |              |                        | 0.01        |      |        |               |     | 1.00         |
| TXB2                        | LMFA03030002              | COX                  | 20:4n-6 (ARA)  | 0.66         |       |        |               |              |                        | 0.00        |      |        |               |     | 1.00         |
| 11-HETE                     | LMFA03060028              | COX                  | 20:4n-6 (ARA)  | 0.17         |       | 0.18   |               |              |                        | 0.02        |      | 0.07   |               |     | 1.00         |

| Metabolite    | Lipid Map ID <sup>a</sup> | Biosynthetic pathway | PUFA          | coefficients |      |        |               |              |                        | p-values    |      |        |               |              | FDR  |
|---------------|---------------------------|----------------------|---------------|--------------|------|--------|---------------|--------------|------------------------|-------------|------|--------|---------------|--------------|------|
|               |                           |                      |               | (Intercept)  | ARA  | Gender | ARA quadratic | ARA x Gender | ARA quadratic x Gender | (Intercept) | ARA  | Gender | ARA quadratic | ARA x Gender |      |
| 5,6-DiHETrE   | LMFA03050004              | CYP                  | 20:4n-6 (ARA) | 0.01         | 0.37 |        |               |              |                        | 0.79        | 0.00 |        |               |              | 0.02 |
| 11,12-DiHETrE | LMFA03050008              | CYP                  | 20:4n-6 (ARA) | 0.10         |      |        |               |              |                        | 0.00        |      |        |               |              | 1.00 |
| 14,15-DiHETrE | LMFA03050010              | CYP                  | 20:4n-6 (ARA) | 0.25         | 0.72 | 0.13   | -0.45         |              |                        | 0.00        | 0.00 | 0.00   | 0.07          |              | 0.03 |
| 5-HETE        | LMFA03060002              | LOX                  | 20:4n-6 (ARA) | 1.18         |      |        |               |              |                        | 0.00        |      |        |               |              | 1.00 |
| 8-HETE        | LMFA03060006              | LOX                  | 20:4n-6 (ARA) | 0.30         | 0.28 | 0.31   |               | -0.50        |                        | 0.01        | 0.14 | 0.04   |               | 0.07         | 1.00 |
| 12-HETE       | LMFA03060088              | LOX                  | 20:4n-6 (ARA) | 0.44         |      |        |               |              |                        | 0.00        |      |        |               |              | 1.00 |
| 15-HETE       | LMFA03060001              | LOX                  | 20:4n-6 (ARA) | 0.32         |      |        |               |              |                        | 0.00        |      |        |               |              | 1.00 |
| PGF3a         | LMFA03010138              | COX                  | 20:5n-3 (EPA) | 0.79         |      |        |               |              |                        | 0.00        |      |        |               |              | 1.00 |
| 17,18-DiHETE  | LMFA03060078              | CYP                  | 20:5n-3 (EPA) | 1.63         |      |        |               |              |                        | 0.00        |      |        |               |              | 1.00 |
| 5(S)-HEPE     | LMFA03070010              | LOX                  | 20:5n-3 (EPA) | 0.13         |      |        | -0.42         |              |                        | 0.15        |      | 0.07   |               |              | 0.26 |
| 19(20)-EpDPE  | LMFA04000038              | CYP                  | 22:5n-3 (DHA) | 1.98         |      |        |               |              |                        | 0.00        |      |        |               |              | 1.00 |
| 19,20-DiHDPA  | LMFA04000043              | CYP                  | 22:5n-3 (DHA) | 1.24         |      |        |               |              |                        | 0.00        |      |        |               |              | 1.00 |

<sup>a</sup> Lipid classification according to LIPID MAPS Structure Database (33). Coefficient, p-value, and False Discovery Rate (FDR) for diet and gender (interaction) effects by linear mixed modeling methodology. Terms are linear unless stated otherwise (quadratic).
