# Supplementary material
Source: PubMed Central journal article supplement (PMC3646461)
Supplement: supp_M034918_jlr.M034918-4.pdf [file supp_M034918_jlr.M034918-4.pdf]

**TABLE S3 (supplemental):** Dose-response effect of dietary DHA intake at constant ARA on plasma metabolite concentrations

| Metabolite                          | Lipid Map ID <sup>a</sup> | Biosynthetic pathway | PUFA           | Coefficients |       |        |               |              |                        | P-value     |      |        |               |              |                        | FDR  |
|-------------------------------------|---------------------------|----------------------|----------------|--------------|-------|--------|---------------|--------------|------------------------|-------------|------|--------|---------------|--------------|------------------------|------|
|                                     |                           |                      |                | (Intercept)  | DHA   | Gender | DHA quadratic | DHA x Gender | DHA quadratic x Gender | (Intercept) | DHA  | Gender | DHA quadratic | DHA x Gender | DHA quadratic x Gender |      |
| 9(10)-EpOME                         | LMFA02000037              | CYP                  | 18:2n-6 (LA)   | 0.56         | -1.55 | -0.86  | 1.37          | 3.68         | -3.01                  | 0.09        | 0.27 | 0.07   | 0.29          | 0.07         | 0.09                   | 0.63 |
| 9,10-DiHOME                         | LMFA01050350              | CYP                  | 18:2n-6 (LA)   | 1.43         | -2.26 | -0.61  | 2.05          | 2.28         | -2.04                  | 0.00        | 0.03 | 0.05   | 0.04          | 0.08         | 0.08                   | 0.15 |
| 12(13)-EpOME                        | LMFA02000038              | CYP                  | 18:2n-6 (LA)   | 0.94         | -2.32 | -1.22  | 2.14          | 5.35         | -4.99                  | 0.04        | 0.22 | 0.06   | 0.22          | 0.05         | 0.05                   | 0.17 |
| 12,13-DiHOME                        | LMFA01050351              | CYP                  | 18:2n-6 (LA)   | 1.14         | -1.15 | 0.06   | 1.18          |              | -0.24                  | 0.00        | 0.03 | 0.27   | 0.02          |              | 0.08                   | 0.12 |
| 9-HODE                              | LMFA01050278              | LOX                  | 18:2n-6 (LA)   | 1.61         | -0.96 |        | 0.96          |              |                        | 0.00        | 0.11 |        | 0.08          |              |                        | 0.20 |
| 13-HODE                             | LMFA01050349              | LOX                  | 18:2n-6 (LA)   | 1.72         |       |        |               |              |                        | 0.00        |      |        |               |              |                        | 1.00 |
| 13-KODE                             | LMFA02000016              | LOX                  | 18:2n-6 (LA)   | 0.53         |       |        |               |              |                        | 0.00        |      |        |               |              |                        | 1.00 |
| 9-HOTrE                             | LMFA02000024              | LOX                  | 18:3n-3 (ALA)  | 0.04         |       |        |               |              |                        | 0.24        |      |        |               |              |                        | 1.00 |
| PGF1 $\alpha$                       | LMFA03010137              | COX                  | 20:3n-6 (DGLA) | 0.26         |       |        |               |              |                        | 0.00        |      |        |               |              |                        | 1.00 |
| PGF2 $\alpha$                       | LMFA03010002              | COX                  | 20:4n-6 (ARA)  | 0.51         |       |        |               |              |                        | 0.00        |      |        |               |              |                        | 1.00 |
| PGE2                                | LMFA03010003              | COX                  | 20:4n-6 (ARA)  | 0.15         | -0.40 | -0.60  |               | 0.98         |                        | 0.45        | 0.27 | 0.05   |               | 0.06         |                        | 0.20 |
| 13,14-dihydro-15-keto-PGF2 $\alpha$ | LMFA03010027              | COX                  | 20:4n-6 (ARA)  | 0.05         | 0.63  | -0.77  | -0.85         | 3.16         | -2.70                  | 0.80        | 0.48 | 0.08   | 0.34          | 0.10         | 0.12                   | 0.25 |
| TXB2                                | LMFA03030002              | COX                  | 20:4n-6 (ARA)  | -0.05        | 2.81  |        | -2.82         |              |                        | 0.84        | 0.02 |        | 0.01          |              |                        | 0.10 |
| 11-HETE                             | LMFA03060028              | COX                  | 20:4n-6 (ARA)  | 0.24         |       |        |               |              |                        | 0.00        |      |        |               |              |                        | 1.00 |

| Metabolite    | Lipid Map ID <sup>a</sup> | Biosynthetic pathway | PUFA          | Coefficients |      |        |               |              |                        | P-value     |      |        |               |              | FDR         |
|---------------|---------------------------|----------------------|---------------|--------------|------|--------|---------------|--------------|------------------------|-------------|------|--------|---------------|--------------|-------------|
|               |                           |                      |               | (Intercept)  | DHA  | Gender | DHA quadratic | DHA x Gender | DHA quadratic x Gender | (Intercept) | DHA  | Gender | DHA quadratic | DHA x Gender |             |
| 5,6-DiHETrE   | LMFA03050004              | CYP                  | 20:4n-6 (ARA) | 0.23         |      |        |               |              |                        | 0.00        |      |        |               |              | 1.00        |
| 11,12-DiHETrE | LMFA03050008              | CYP                  | 20:4n-6 (ARA) | 0.10         |      |        |               |              |                        | 0.01        |      |        |               |              | 1.00        |
| 14,15-DiHETrE | LMFA03050010              | CYP                  | 20:4n-6 (ARA) | 0.48         |      | 0.12   |               |              |                        | 0.00        |      | 0.03   |               |              | 1.00        |
| 5-HETE        | LMFA03060002              | LOX                  | 20:4n-6 (ARA) | 1.24         |      |        |               |              |                        | 0.00        |      |        |               |              | 1.00        |
| 8-HETE        | LMFA03060006              | LOX                  | 20:4n-6 (ARA) | 0.43         |      |        |               |              |                        | 0.00        |      |        |               |              | 1.00        |
| 12-HETE       | LMFA03060088              | LOX                  | 20:4n-6 (ARA) | 0.41         |      |        |               |              |                        | 0.00        |      |        |               |              | 1.00        |
| 15-HETE       | LMFA03060001              | LOX                  | 20:4n-6 (ARA) | 0.28         |      |        |               |              |                        | 0.00        |      |        |               |              | 1.00        |
| PGF3 $\alpha$ | LMFA03010138              | COX                  | 20:5n-3 (EPA) | 0.83         |      |        |               |              |                        | 0.00        |      |        |               |              | 1.00        |
| 17,18-DiHETE  | LMFA03060078              | CYP                  | 20:5n-3 (EPA) | 1.44         |      |        | 0.31          |              |                        | 0.00        |      | 0.00   |               |              | <b>0.04</b> |
| 5(S)-HEPE     | LMFA03070010              | LOX                  | 20:5n-3 (EPA) | -0.26        | 0.34 |        |               |              |                        | 0.01        | 0.02 |        |               |              | 0.12        |
| 19(20)-EpDPE  | LMFA04000038              | CYP                  | 22:5n-3 (DHA) | 1.97         |      | -0.28  |               |              |                        | 0.00        |      | 0.05   |               |              | 1.00        |
| 19,20-DiHDPA  | LMFA04000043              | CYP                  | 22:5n-3 (DHA) | 1.01         |      |        | 0.39          |              |                        | 0.00        |      | 0.00   |               |              | <b>0.02</b> |

<sup>a</sup> Lipid classification according to LIPID MAPS Structure Database (33). Coefficient, p-value, and False Discovery Rate (FDR) for diet and gender (interaction) effects by linear mixed modeling methodology. Terms are linear unless stated otherwise (quadratic).
